# Supplementary material for: Identification and co-expression analysis of long noncoding RNAs and mRNAs involved in the deposition of intramuscular fat in Aohan fine-wool sheep
Source: BMC Genomics. 2021 Feb 1;22:98. doi: 10.1186/s12864-021-07385-9 (PMC7852088; doi:10.1186/s12864-021-07385-9)
Supplement: Supplementary file 7 — Additional file 7 Table S7(A). GO enrichment analysis of differentially expressed target mRNAs of differentially expressed lncRNAs in the study. Table S7 (B). KEGG enrichment analysis of differentially expressed target mRNAs of differentially expressed lncRNAs in the study. [file 12864_2021_7385_MOESM7_ESM.xlsx]

## Sheet: Table 7A
GO_ID	GO_Term	GO_function	GO_class	S.gene.number	TS.gene.number	B.gene.number	TB.gene.number	pvalue
GO:0045987	positive regulation of smooth muscle contraction	biological_process	10	2	46	11	14094	0.000562545
GO:0070469	respirasome	cellular_component	4	2	46	22	14094	0.00230931
GO:0007010	cytoskeleton organization	biological_process	6	3	46	82	14094	0.00240625
GO:0010736	serum response element binding	molecular_function	11	1	46	1	14094	0.0032638
GO:0030038	contractile actin filament bundle assembly	biological_process	7	1	46	1	14094	0.0032638
GO:1905931	negative regulation of vascular smooth muscle cell differentiation involved in phenotypic switching	biological_process	11	1	46	1	14094	0.0032638
GO:2001038	regulation of cellular response to drug	biological_process	6	1	46	1	14094	0.0032638
GO:0019682	glyceraldehyde-3-phosphate metabolic process	biological_process	6	1	46	1	14094	0.0032638
GO:0061301	cerebellum vasculature morphogenesis	biological_process	5	1	46	1	14094	0.0032638
GO:0004807	triose-phosphate isomerase activity	molecular_function	7	1	46	1	14094	0.0032638
GO:0070092	regulation of glucagon secretion	biological_process	10	1	46	1	14094	0.0032638
GO:0097632	extrinsic component of phagophore assembly site membrane	cellular_component	6	1	46	1	14094	0.0032638
GO:0072684	mitochondrial tRNA 3'-trailer cleavage, endonucleolytic	biological_process	11	1	46	1	14094	0.0032638
GO:0061092	positive regulation of phospholipid translocation	biological_process	8	1	46	1	14094	0.0032638
GO:1901526	positive regulation of mitophagy	biological_process	11	1	46	1	14094	0.0032638
GO:0000435	positive regulation of transcription from RNA polymerase II promoter by galactose	biological_process	11	1	46	1	14094	0.0032638
GO:2001237	negative regulation of extrinsic apoptotic signaling pathway	biological_process	10	2	46	28	14094	0.00373213
GO:0020037	heme binding	molecular_function	6	3	46	97	14094	0.00387188
GO:0004519	endonuclease activity	molecular_function	7	2	46	33	14094	0.00515942
GO:0090009	primitive streak formation	biological_process	5	1	46	2	14094	0.00651718
GO:1904017	cellular response to Thyroglobulin triiodothyronine	biological_process	6	1	46	2	14094	0.00651718
GO:1903979	negative regulation of microglial cell activation	biological_process	9	1	46	2	14094	0.00651718
GO:0020018	ciliary pocket membrane	cellular_component	7	1	46	2	14094	0.00651718
GO:0061629	RNA polymerase II-specific DNA-binding transcription factor binding	molecular_function	7	1	46	2	14094	0.00651718
GO:0042701	progesterone secretion	biological_process	7	1	46	2	14094	0.00651718
GO:0097629	extrinsic component of omegasome membrane	cellular_component	6	1	46	2	14094	0.00651718
GO:0060713	labyrinthine layer morphogenesis	biological_process	5	1	46	2	14094	0.00651718
GO:0033561	regulation of water loss via skin	biological_process	9	1	46	2	14094	0.00651718
GO:0097635	extrinsic component of autophagosome membrane	cellular_component	7	1	46	2	14094	0.00651718
GO:0016240	autophagosome membrane docking	biological_process	6	1	46	2	14094	0.00651718
GO:0030516	regulation of axon extension	biological_process	7	1	46	2	14094	0.00651718
GO:1905460	negative regulation of vascular associated smooth muscle cell apoptotic process	biological_process	12	1	46	2	14094	0.00651718
GO:0060532	bronchus cartilage development	biological_process	7	1	46	2	14094	0.00651718
GO:0046166	glyceraldehyde-3-phosphate biosynthetic process	biological_process	7	1	46	2	14094	0.00651718
GO:0072320	volume-sensitive chloride channel activity	molecular_function	9	1	46	2	14094	0.00651718
GO:0061145	lung smooth muscle development	biological_process	8	1	46	2	14094	0.00651718
GO:0097062	dendritic spine maintenance	biological_process	6	1	46	2	14094	0.00651718
GO:0032776	DNA methylation on cytosine	biological_process	11	1	46	2	14094	0.00651718
GO:0097340	inhibition of cysteine-type endopeptidase activity	biological_process	12	1	46	2	14094	0.00651718
GO:0060947	cardiac vascular smooth muscle cell differentiation	biological_process	7	1	46	2	14094	0.00651718
GO:0030165	PDZ domain binding	molecular_function	6	2	46	42	14094	0.00825821
GO:0004518	nuclease activity	molecular_function	6	2	46	42	14094	0.00825821
GO:0005776	autophagosome	cellular_component	7	2	46	42	14094	0.00825821
GO:0009055	electron transfer activity	molecular_function	5	2	46	43	14094	0.00864317
GO:1903508	positive regulation of nucleic acid-templated transcription	biological_process	10	2	46	45	14094	0.00943684
GO:0090043	regulation of tubulin deacetylation	biological_process	10	1	46	3	14094	0.00976017
GO:0002521	leukocyte differentiation	biological_process	6	1	46	3	14094	0.00976017
GO:0022028	tangential migration from the subventricular zone to the olfactory bulb	biological_process	9	1	46	3	14094	0.00976017
GO:0035426	extracellular matrix-cell signaling	biological_process	5	1	46	3	14094	0.00976017
GO:0051013	microtubule severing	biological_process	8	1	46	3	14094	0.00976017
GO:1903142	positive regulation of establishment of endothelial barrier	biological_process	10	1	46	3	14094	0.00976017
GO:0003886	DNA (cytosine-5-)-methyltransferase activity	molecular_function	8	1	46	3	14094	0.00976017
GO:0042255	ribosome assembly	biological_process	9	1	46	3	14094	0.00976017
GO:0009008	DNA-methyltransferase activity	molecular_function	7	1	46	3	14094	0.00976017
GO:0030947	regulation of vascular endothelial growth factor receptor signaling pathway	biological_process	8	1	46	3	14094	0.00976017
GO:0003257	positive regulation of transcription from RNA polymerase II promoter involved in myocardial precursor cell differentiation	biological_process	12	1	46	3	14094	0.00976017
GO:0010735	positive regulation of transcription via serum response element binding	biological_process	11	1	46	3	14094	0.00976017
GO:0002155	regulation of thyroid hormone mediated signaling pathway	biological_process	8	1	46	3	14094	0.00976017
GO:0072089	stem cell proliferation	biological_process	4	1	46	3	14094	0.00976017
GO:0150012	positive regulation of neuron projection arborization	biological_process	12	1	46	3	14094	0.00976017
GO:0045719	negative regulation of glycogen biosynthetic process	biological_process	11	1	46	3	14094	0.00976017
GO:0007223	Wnt signaling pathway, calcium modulating pathway	biological_process	9	1	46	3	14094	0.00976017
GO:0043231	intracellular membrane-bounded organelle	cellular_component	5	5	46	429	14094	0.0125501
GO:0016458	gene silencing	biological_process	4	1	46	4	14094	0.0129928
GO:1900222	negative regulation of amyloid-beta clearance	biological_process	7	1	46	4	14094	0.0129928
GO:0008135	translation factor activity, RNA binding	molecular_function	7	1	46	4	14094	0.0129928
GO:0051573	negative regulation of histone H3-K9 methylation	biological_process	12	1	46	4	14094	0.0129928
GO:0005833	hemoglobin complex	cellular_component	4	1	46	4	14094	0.0129928
GO:0060534	trachea cartilage development	biological_process	7	1	46	4	14094	0.0129928
GO:0061304	retinal blood vessel morphogenesis	biological_process	7	1	46	4	14094	0.0129928
GO:0043576	regulation of respiratory gaseous exchange	biological_process	6	1	46	4	14094	0.0129928
GO:0019215	intermediate filament binding	molecular_function	5	1	46	4	14094	0.0129928
GO:0031063	regulation of histone deacetylation	biological_process	10	1	46	4	14094	0.0129928
GO:0004185	serine-type carboxypeptidase activity	molecular_function	9	1	46	4	14094	0.0129928
GO:0043045	DNA methylation involved in embryo development	biological_process	11	1	46	4	14094	0.0129928
GO:0043184	vascular endothelial growth factor receptor 2 binding	molecular_function	8	1	46	4	14094	0.0129928
GO:0075044	autophagy of host cells involved in interaction with symbiont	biological_process	10	1	46	4	14094	0.0129928
GO:0006930	substrate-dependent cell migration, cell extension	biological_process	8	1	46	4	14094	0.0129928
GO:0060261	positive regulation of transcription initiation from RNA polymerase II promoter	biological_process	11	1	46	4	14094	0.0129928
GO:0090116	C-5 methylation of cytosine	biological_process	12	1	46	4	14094	0.0129928
GO:2001141	regulation of RNA biosynthetic process	biological_process	8	1	46	5	14094	0.0162151
GO:0061299	retina vasculature morphogenesis in camera-type eye	biological_process	5	1	46	5	14094	0.0162151
GO:0033299	secretion of lysosomal enzymes	biological_process	11	1	46	5	14094	0.0162151
GO:0010216	maintenance of DNA methylation	biological_process	8	1	46	5	14094	0.0162151
GO:0045794	negative regulation of cell volume	biological_process	8	1	46	5	14094	0.0162151
GO:0001553	luteinization	biological_process	5	1	46	5	14094	0.0162151
GO:0031643	positive regulation of myelination	biological_process	7	1	46	5	14094	0.0162151
GO:0005851	eukaryotic translation initiation factor 2B complex	cellular_component	4	1	46	5	14094	0.0162151
GO:0046872	metal ion binding	molecular_function	6	9	46	1230	14094	0.0164378
GO:0022900	electron transport chain	biological_process	6	2	46	63	14094	0.0179383
GO:0035912	dorsal aorta morphogenesis	biological_process	9	1	46	6	14094	0.0194271
GO:1903146	regulation of autophagy of mitochondrion	biological_process	9	1	46	6	14094	0.0194271
GO:0043589	skin morphogenesis	biological_process	6	1	46	6	14094	0.0194271
GO:0140078	class I DNA-(apurinic or apyrimidinic site) endonuclease activity	molecular_function	6	1	46	6	14094	0.0194271
GO:0070878	primary miRNA binding	molecular_function	7	1	46	6	14094	0.0194271
GO:0001955	blood vessel maturation	biological_process	6	1	46	6	14094	0.0194271
GO:0010669	epithelial structure maintenance	biological_process	8	1	46	6	14094	0.0194271
GO:0051091	positive regulation of DNA-binding transcription factor activity	biological_process	6	2	46	66	14094	0.0195807
GO:0090305	nucleic acid phosphodiester bond hydrolysis	biological_process	8	2	46	66	14094	0.0195807
GO:0031175	neuron projection development	biological_process	7	2	46	71	14094	0.0224526
GO:0098609	cell-cell adhesion	biological_process	5	2	46	71	14094	0.0224526
GO:0034045	phagophore assembly site membrane	cellular_component	6	1	46	7	14094	0.0226289
GO:0006390	mitochondrial transcription	biological_process	10	1	46	7	14094	0.0226289
GO:0035065	regulation of histone acetylation	biological_process	10	1	46	7	14094	0.0226289
GO:0031987	locomotion involved in locomotory behavior	biological_process	4	1	46	7	14094	0.0226289
GO:0009725	response to hormone	biological_process	5	1	46	7	14094	0.0226289
GO:0090136	epithelial cell-cell adhesion	biological_process	6	1	46	7	14094	0.0226289
GO:0060347	heart trabecula formation	biological_process	6	1	46	7	14094	0.0226289
GO:0042623	ATPase activity, coupled	molecular_function	10	1	46	7	14094	0.0226289
GO:0015671	oxygen transport	biological_process	7	1	46	7	14094	0.0226289
GO:0005344	oxygen carrier activity	molecular_function	4	1	46	7	14094	0.0226289
GO:0055003	cardiac myofibril assembly	biological_process	8	1	46	8	14094	0.0258204
GO:0010812	negative regulation of cell-substrate adhesion	biological_process	7	1	46	8	14094	0.0258204
GO:0017162	aryl hydrocarbon receptor binding	molecular_function	6	1	46	8	14094	0.0258204
GO:0060292	long-term synaptic depression	biological_process	10	1	46	8	14094	0.0258204
GO:0051571	positive regulation of histone H3-K4 methylation	biological_process	12	1	46	8	14094	0.0258204
GO:1990023	mitotic spindle midzone	cellular_component	7	1	46	8	14094	0.0258204
GO:0060218	hematopoietic stem cell differentiation	biological_process	7	1	46	8	14094	0.0258204
GO:0090309	positive regulation of methylation-dependent chromatin silencing	biological_process	8	1	46	8	14094	0.0258204
GO:0061029	eyelid development in camera-type eye	biological_process	5	1	46	8	14094	0.0258204
GO:1990316	Atg1/ULK1 kinase complex	cellular_component	6	1	46	8	14094	0.0258204
GO:0007043	cell-cell junction assembly	biological_process	7	1	46	8	14094	0.0258204
GO:0045664	regulation of neuron differentiation	biological_process	9	1	46	8	14094	0.0258204
GO:0005522	profilin binding	molecular_function	5	1	46	8	14094	0.0258204
GO:0045059	positive thymic T cell selection	biological_process	6	1	46	8	14094	0.0258204
GO:0018095	protein polyglutamylation	biological_process	11	1	46	8	14094	0.0258204
GO:0005770	late endosome	cellular_component	8	2	46	77	14094	0.0261137
GO:0019825	oxygen binding	molecular_function	5	1	46	9	14094	0.0290017
GO:0032045	guanyl-nucleotide exchange factor complex	cellular_component	4	1	46	9	14094	0.0290017
GO:0043149	stress fiber assembly	biological_process	8	1	46	9	14094	0.0290017
GO:0002011	morphogenesis of an epithelial sheet	biological_process	7	1	46	9	14094	0.0290017
GO:0006446	regulation of translational initiation	biological_process	10	1	46	9	14094	0.0290017
GO:0042581	specific granule	cellular_component	9	1	46	9	14094	0.0290017
GO:0005247	voltage-gated chloride channel activity	molecular_function	9	1	46	9	14094	0.0290017
GO:0005737	cytoplasm	cellular_component	5	13	46	2311	14094	0.0299652
GO:1902894	negative regulation of pri-miRNA transcription by RNA polymerase II	biological_process	11	1	46	10	14094	0.0321729
GO:0042789	mRNA transcription by RNA polymerase II	biological_process	10	1	46	10	14094	0.0321729
GO:0031333	negative regulation of protein complex assembly	biological_process	7	1	46	10	14094	0.0321729
GO:0004869	cysteine-type endopeptidase inhibitor activity	molecular_function	8	1	46	11	14094	0.035334
GO:0042026	protein refolding	biological_process	5	1	46	11	14094	0.035334
GO:0002042	cell migration involved in sprouting angiogenesis	biological_process	11	1	46	11	14094	0.035334
GO:0046716	muscle cell cellular homeostasis	biological_process	5	1	46	11	14094	0.035334
GO:0016810	hydrolase activity, acting on carbon-nitrogen (but not peptide) bonds	molecular_function	5	1	46	11	14094	0.035334
GO:0014003	oligodendrocyte development	biological_process	7	1	46	11	14094	0.035334
GO:0005721	pericentric heterochromatin	cellular_component	8	1	46	11	14094	0.035334
GO:0070577	lysine-acetylated histone binding	molecular_function	6	1	46	11	14094	0.035334
GO:0006626	protein targeting to mitochondrion	biological_process	12	1	46	11	14094	0.035334
GO:0097352	autophagosome maturation	biological_process	7	1	46	12	14094	0.0384849
GO:0048821	erythrocyte development	biological_process	7	1	46	12	14094	0.0384849
GO:0001829	trophectodermal cell differentiation	biological_process	6	1	46	12	14094	0.0384849
GO:0005671	Ada2/Gcn5/Ada3 transcription activator complex	cellular_component	8	1	46	12	14094	0.0384849
GO:0012506	vesicle membrane	cellular_component	5	1	46	12	14094	0.0384849
GO:0070830	bicellular tight junction assembly	biological_process	9	1	46	12	14094	0.0384849
GO:0090398	cellular senescence	biological_process	6	1	46	12	14094	0.0384849
GO:0019899	enzyme binding	molecular_function	5	3	46	230	14094	0.0389541
GO:0004180	carboxypeptidase activity	molecular_function	8	1	46	13	14094	0.0416258
GO:0008327	methyl-CpG binding	molecular_function	6	1	46	13	14094	0.0416258
GO:0042813	Wnt-activated receptor activity	molecular_function	6	1	46	13	14094	0.0416258
GO:0031201	SNARE complex	cellular_component	6	1	46	13	14094	0.0416258
GO:0008306	associative learning	biological_process	6	1	46	13	14094	0.0416258
GO:0030220	platelet formation	biological_process	7	1	46	13	14094	0.0416258
GO:0006094	gluconeogenesis	biological_process	9	1	46	13	14094	0.0416258
GO:0005158	insulin receptor binding	molecular_function	6	1	46	13	14094	0.0416258
GO:0051056	regulation of small GTPase mediated signal transduction	biological_process	9	1	46	13	14094	0.0416258
GO:0019955	cytokine binding	molecular_function	5	1	46	13	14094	0.0416258
GO:0003682	chromatin binding	molecular_function	4	3	46	239	14094	0.0428598
GO:0010466	negative regulation of peptidase activity	biological_process	10	1	46	14	14094	0.0447566
GO:0016922	nuclear receptor binding	molecular_function	8	1	46	14	14094	0.0447566
GO:2000114	regulation of establishment of cell polarity	biological_process	7	1	46	14	14094	0.0447566
GO:0051491	positive regulation of filopodium assembly	biological_process	11	1	46	14	14094	0.0447566
GO:0000145	exocyst	cellular_component	7	1	46	14	14094	0.0447566
GO:0030425	dendrite	cellular_component	6	2	46	105	14094	0.0460182
GO:0030041	actin filament polymerization	biological_process	8	1	46	15	14094	0.0478774
GO:0035855	megakaryocyte development	biological_process	7	1	46	15	14094	0.0478774
GO:0006306	DNA methylation	biological_process	10	1	46	15	14094	0.0478774
GO:0030878	thyroid gland development	biological_process	7	1	46	15	14094	0.0478774
GO:0007369	gastrulation	biological_process	6	1	46	15	14094	0.0478774
GO:0060324	face development	biological_process	5	1	46	15	14094	0.0478774
GO:0002102	podosome	cellular_component	4	1	46	15	14094	0.0478774
GO:0046777	protein autophosphorylation	biological_process	10	2	46	110	14094	0.0500155
GO:0045773	positive regulation of axon extension	biological_process	8	1	46	16	14094	0.0509883
GO:0060425	lung morphogenesis	biological_process	6	1	46	16	14094	0.0509883
GO:0004012	phospholipid-translocating ATPase activity	molecular_function	6	1	46	16	14094	0.0509883
GO:0030414	peptidase inhibitor activity	molecular_function	6	1	46	16	14094	0.0509883
GO:0030863	cortical cytoskeleton	cellular_component	7	1	46	16	14094	0.0509883
GO:0034067	protein localization to Golgi apparatus	biological_process	8	1	46	17	14094	0.0540892
GO:1904707	positive regulation of vascular smooth muscle cell proliferation	biological_process	9	1	46	17	14094	0.0540892
GO:0016925	protein sumoylation	biological_process	11	1	46	17	14094	0.0540892
GO:0035257	nuclear hormone receptor binding	molecular_function	7	1	46	17	14094	0.0540892
GO:0022604	regulation of cell morphogenesis	biological_process	7	1	46	17	14094	0.0540892
GO:0000790	nuclear chromatin	cellular_component	7	2	46	116	14094	0.054972
GO:0007275	multicellular organism development	biological_process	4	2	46	117	14094	0.0558145
GO:0033137	negative regulation of peptidyl-serine phosphorylation	biological_process	11	1	46	18	14094	0.0571802
GO:0006904	vesicle docking involved in exocytosis	biological_process	7	1	46	18	14094	0.0571802
GO:0005911	cell-cell junction	cellular_component	4	2	46	122	14094	0.0600951
GO:0043967	histone H4 acetylation	biological_process	11	1	46	19	14094	0.0602613
GO:0000086	G2/M transition of mitotic cell cycle	biological_process	7	1	46	19	14094	0.0602613
GO:0016236	macroautophagy	biological_process	7	1	46	19	14094	0.0602613
GO:0005657	replication fork	cellular_component	6	1	46	19	14094	0.0602613
GO:0003713	transcription coactivator activity	molecular_function	5	2	46	124	14094	0.0618384
GO:0005254	chloride channel activity	molecular_function	8	1	46	20	14094	0.0633325
GO:0030331	estrogen receptor binding	molecular_function	9	1	46	20	14094	0.0633325
GO:0016788	hydrolase activity, acting on ester bonds	molecular_function	5	1	46	20	14094	0.0633325
GO:0045214	sarcomere organization	biological_process	9	1	46	20	14094	0.0633325
GO:0045597	positive regulation of cell differentiation	biological_process	7	1	46	20	14094	0.0633325
GO:0045332	phospholipid translocation	biological_process	9	1	46	20	14094	0.0633325
GO:0044877	protein-containing complex binding	molecular_function	4	2	46	127	14094	0.0644857
GO:0017147	Wnt-protein binding	molecular_function	5	1	46	21	14094	0.066394
GO:0030168	platelet activation	biological_process	5	1	46	21	14094	0.066394
GO:0001569	branching involved in blood vessel morphogenesis	biological_process	7	1	46	21	14094	0.066394
GO:0097009	energy homeostasis	biological_process	5	1	46	21	14094	0.066394
GO:0048589	developmental growth	biological_process	4	1	46	21	14094	0.066394
GO:0003677	DNA binding	molecular_function	6	6	46	888	14094	0.0672455
GO:0009897	external side of plasma membrane	cellular_component	5	2	46	132	14094	0.0689819
GO:0006006	glucose metabolic process	biological_process	8	1	46	22	14094	0.0694456
GO:0046983	protein dimerization activity	molecular_function	5	2	46	135	14094	0.0717284
GO:0034097	response to cytokine	biological_process	6	1	46	23	14094	0.0724875
GO:0010975	regulation of neuron projection development	biological_process	10	1	46	23	14094	0.0724875
GO:0007507	heart development	biological_process	6	2	46	138	14094	0.0745105
GO:0031410	cytoplasmic vesicle	cellular_component	6	2	46	139	14094	0.0754455
GO:0051020	GTPase binding	molecular_function	6	1	46	24	14094	0.0755197
GO:0006096	glycolytic process	biological_process	10	1	46	24	14094	0.0755197
GO:0043086	negative regulation of catalytic activity	biological_process	6	1	46	24	14094	0.0755197
GO:0034605	cellular response to heat	biological_process	6	1	46	24	14094	0.0755197
GO:1902895	positive regulation of pri-miRNA transcription by RNA polymerase II	biological_process	11	1	46	24	14094	0.0755197
GO:0006281	DNA repair	biological_process	8	2	46	140	14094	0.0763844
GO:0042803	protein homodimerization activity	molecular_function	6	4	46	496	14094	0.0776175
GO:0000792	heterochromatin	cellular_component	7	1	46	25	14094	0.0785421
GO:0005622	intracellular	cellular_component	4	4	46	499	14094	0.0789677
GO:0004896	cytokine receptor activity	molecular_function	6	1	46	26	14094	0.0815549
GO:0001707	mesoderm formation	biological_process	6	1	46	26	14094	0.0815549
GO:0008180	COP9 signalosome	cellular_component	4	1	46	27	14094	0.0845581
GO:0015914	phospholipid transport	biological_process	8	1	46	27	14094	0.0845581
GO:1990841	promoter-specific chromatin binding	molecular_function	5	1	46	27	14094	0.0845581
GO:0043507	positive regulation of JUN kinase activity	biological_process	13	1	46	27	14094	0.0845581
GO:0031463	Cul3-RING ubiquitin ligase complex	cellular_component	7	1	46	27	14094	0.0845581
GO:0019843	rRNA binding	molecular_function	7	1	46	28	14094	0.0875517
GO:0030155	regulation of cell adhesion	biological_process	5	1	46	28	14094	0.0875517
GO:0005912	adherens junction	cellular_component	5	1	46	28	14094	0.0875517
GO:0007017	microtubule-based process	biological_process	4	1	46	28	14094	0.0875517
GO:0043407	negative regulation of MAP kinase activity	biological_process	12	1	46	28	14094	0.0875517
GO:0007265	Ras protein signal transduction	biological_process	7	1	46	28	14094	0.0875517
GO:0030141	secretory granule	cellular_component	8	1	46	28	14094	0.0875517
GO:0008286	insulin receptor signaling pathway	biological_process	8	1	46	29	14094	0.0905356
GO:0006289	nucleotide-excision repair	biological_process	9	1	46	29	14094	0.0905356
GO:0006511	ubiquitin-dependent protein catabolic process	biological_process	10	2	46	156	14094	0.0918972
GO:0071230	cellular response to amino acid stimulus	biological_process	7	1	46	30	14094	0.0935101
GO:0009058	biosynthetic process	biological_process	4	1	46	30	14094	0.0935101
GO:0034446	substrate adhesion-dependent cell spreading	biological_process	8	1	46	30	14094	0.0935101
GO:0001947	heart looping	biological_process	7	1	46	30	14094	0.0935101
GO:0030838	positive regulation of actin filament polymerization	biological_process	9	1	46	30	14094	0.0935101
GO:0005200	structural constituent of cytoskeleton	molecular_function	4	1	46	30	14094	0.0935101
GO:0031490	chromatin DNA binding	molecular_function	7	1	46	30	14094	0.0935101
GO:0030374	nuclear receptor transcription coactivator activity	molecular_function	6	1	46	31	14094	0.096475
GO:0010977	negative regulation of neuron projection development	biological_process	11	1	46	31	14094	0.096475
GO:0006464	cellular protein modification process	biological_process	8	1	46	31	14094	0.096475
GO:0005739	mitochondrion	cellular_component	6	5	46	752	14094	0.0969032
GO:0001540	amyloid-beta binding	molecular_function	6	1	46	32	14094	0.0994304
GO:0016779	nucleotidyltransferase activity	molecular_function	6	1	46	34	14094	0.105313
GO:0021766	hippocampus development	biological_process	5	1	46	34	14094	0.105313
GO:0045111	intermediate filament cytoskeleton	cellular_component	7	1	46	34	14094	0.105313
GO:0042645	mitochondrial nucleoid	cellular_component	4	1	46	34	14094	0.105313
GO:0031072	heat shock protein binding	molecular_function	5	1	46	35	14094	0.10824
GO:0007612	learning	biological_process	5	1	46	35	14094	0.10824
GO:0005882	intermediate filament	cellular_component	7	1	46	35	14094	0.10824
GO:0048538	thymus development	biological_process	7	1	46	36	14094	0.111158
GO:0005913	cell-cell adherens junction	cellular_component	5	1	46	36	14094	0.111158
GO:0018107	peptidyl-threonine phosphorylation	biological_process	10	1	46	36	14094	0.111158
GO:0045666	positive regulation of neuron differentiation	biological_process	10	1	46	37	14094	0.114066
GO:0001568	blood vessel development	biological_process	5	1	46	37	14094	0.114066
GO:0071944	cell periphery	cellular_component	4	1	46	38	14094	0.116965
GO:0003743	translation initiation factor activity	molecular_function	8	1	46	38	14094	0.116965
GO:0008134	transcription factor binding	molecular_function	5	2	46	182	14094	0.118832
GO:0030900	forebrain development	biological_process	5	1	46	39	14094	0.119855
GO:0005884	actin filament	cellular_component	7	1	46	39	14094	0.119855
GO:0001570	vasculogenesis	biological_process	6	1	46	40	14094	0.122736
GO:0060070	canonical Wnt signaling pathway	biological_process	8	1	46	40	14094	0.122736
GO:0006887	exocytosis	biological_process	7	1	46	41	14094	0.125607
GO:0043010	camera-type eye development	biological_process	8	1	46	41	14094	0.125607
GO:0045893	positive regulation of transcription, DNA-templated	biological_process	9	3	46	379	14094	0.126
GO:0008033	tRNA processing	biological_process	11	1	46	42	14094	0.128469
GO:0031625	ubiquitin protein ligase binding	molecular_function	7	2	46	191	14094	0.128577
GO:1902476	chloride transmembrane transport	biological_process	10	1	46	44	14094	0.134166
GO:0006413	translational initiation	biological_process	5	1	46	44	14094	0.134166
GO:0005762	mitochondrial large ribosomal subunit	cellular_component	9	1	46	44	14094	0.134166
GO:0008021	synaptic vesicle	cellular_component	4	1	46	44	14094	0.134166
GO:0005794	Golgi apparatus	cellular_component	6	4	46	608	14094	0.13568
GO:0008076	voltage-gated potassium channel complex	cellular_component	9	1	46	45	14094	0.137001
GO:0005938	cell cortex	cellular_component	7	1	46	45	14094	0.137001
GO:0005886	plasma membrane	cellular_component	4	8	46	1586	14094	0.13959
GO:0006821	chloride transport	biological_process	9	1	46	46	14094	0.139827
GO:0003690	double-stranded DNA binding	molecular_function	7	1	46	46	14094	0.139827
GO:0050852	T cell receptor signaling pathway	biological_process	8	1	46	46	14094	0.139827
GO:0032091	negative regulation of protein binding	biological_process	7	1	46	47	14094	0.142643
GO:0072686	mitotic spindle	cellular_component	7	1	46	47	14094	0.142643
GO:0031647	regulation of protein stability	biological_process	5	1	46	48	14094	0.145451
GO:0045335	phagocytic vesicle	cellular_component	8	1	46	49	14094	0.148249
GO:0007015	actin filament organization	biological_process	6	1	46	49	14094	0.148249
GO:0001932	regulation of protein phosphorylation	biological_process	9	1	46	50	14094	0.151039
GO:0001933	negative regulation of protein phosphorylation	biological_process	10	1	46	50	14094	0.151039
GO:0000278	mitotic cell cycle	biological_process	5	1	46	50	14094	0.151039
GO:0001726	ruffle	cellular_component	6	1	46	51	14094	0.15382
GO:0007179	transforming growth factor beta receptor signaling pathway	biological_process	8	1	46	52	14094	0.156592
GO:0008104	protein localization	biological_process	5	1	46	52	14094	0.156592
GO:0050728	negative regulation of inflammatory response	biological_process	9	1	46	52	14094	0.156592
GO:0008233	peptidase activity	molecular_function	5	2	46	218	14094	0.158842
GO:0003697	single-stranded DNA binding	molecular_function	7	1	46	53	14094	0.159355
GO:0016787	hydrolase activity	molecular_function	4	4	46	653	14094	0.162983
GO:0005524	ATP binding	molecular_function	5	6	46	1143	14094	0.165997
GO:0007005	mitochondrion organization	biological_process	6	1	46	56	14094	0.16759
GO:0007160	cell-matrix adhesion	biological_process	6	1	46	56	14094	0.16759
GO:0036459	thiol-dependent ubiquitinyl hydrolase activity	molecular_function	9	1	46	57	14094	0.170318
GO:0008013	beta-catenin binding	molecular_function	5	1	46	57	14094	0.170318
GO:0005923	bicellular tight junction	cellular_component	6	1	46	57	14094	0.170318
GO:0047485	protein N-terminus binding	molecular_function	5	1	46	58	14094	0.173037
GO:0019221	cytokine-mediated signaling pathway	biological_process	6	1	46	58	14094	0.173037
GO:0016829	lyase activity	molecular_function	4	1	46	59	14094	0.175747
GO:0005515	protein binding	molecular_function	4	11	46	2488	14094	0.176272
GO:0006914	autophagy	biological_process	6	1	46	60	14094	0.178449
GO:0019903	protein phosphatase binding	molecular_function	7	1	46	61	14094	0.181141
GO:0004843	thiol-dependent ubiquitin-specific protease activity	molecular_function	10	1	46	61	14094	0.181141
GO:0016853	isomerase activity	molecular_function	4	1	46	62	14094	0.183826
GO:0001666	response to hypoxia	biological_process	5	1	46	62	14094	0.183826
GO:0008234	cysteine-type peptidase activity	molecular_function	7	1	46	63	14094	0.186501
GO:0051082	unfolded protein binding	molecular_function	5	1	46	64	14094	0.189168
GO:0044325	ion channel binding	molecular_function	5	1	46	64	14094	0.189168
GO:0010951	negative regulation of endopeptidase activity	biological_process	11	1	46	66	14094	0.194477
GO:0004674	protein serine/threonine kinase activity	molecular_function	8	2	46	252	14094	0.198599
GO:1990830	cellular response to leukemia inhibitory factor	biological_process	8	1	46	68	14094	0.199751
GO:0001764	neuron migration	biological_process	7	1	46	68	14094	0.199751
GO:0006366	transcription by RNA polymerase II	biological_process	9	1	46	69	14094	0.202376
GO:0018105	peptidyl-serine phosphorylation	biological_process	10	1	46	70	14094	0.204992
GO:0005840	ribosome	cellular_component	6	2	46	258	14094	0.20575
GO:0016055	Wnt signaling pathway	biological_process	7	1	46	71	14094	0.207599
GO:0017137	Rab GTPase binding	molecular_function	9	1	46	73	14094	0.21279
GO:0038023	signaling receptor activity	molecular_function	4	1	46	74	14094	0.215372
GO:0035091	phosphatidylinositol binding	molecular_function	6	1	46	74	14094	0.215372
GO:0007411	axon guidance	biological_process	6	1	46	75	14094	0.217947
GO:0007605	sensory perception of sound	biological_process	8	1	46	75	14094	0.217947
GO:0030036	actin cytoskeleton organization	biological_process	7	1	46	75	14094	0.217947
GO:0019901	protein kinase binding	molecular_function	7	2	46	270	14094	0.220138
GO:0006351	transcription, DNA-templated	biological_process	8	1	46	76	14094	0.220513
GO:0005814	centriole	cellular_component	6	1	46	77	14094	0.223071
GO:0009986	cell surface	cellular_component	4	2	46	273	14094	0.22375
GO:0003735	structural constituent of ribosome	molecular_function	4	2	46	273	14094	0.22375
GO:0007156	homophilic cell adhesion via plasma membrane adhesion molecules	biological_process	7	1	46	78	14094	0.22562
GO:0000981	DNA-binding transcription factor activity, RNA polymerase II-specific	molecular_function	5	1	46	82	14094	0.235737
GO:0007420	brain development	biological_process	6	1	46	83	14094	0.238246
GO:0045766	positive regulation of angiogenesis	biological_process	8	1	46	83	14094	0.238246
GO:0006486	protein glycosylation	biological_process	9	1	46	85	14094	0.24324
GO:0015630	microtubule cytoskeleton	cellular_component	7	1	46	91	14094	0.25803
GO:0007166	cell surface receptor signaling pathway	biological_process	5	1	46	93	14094	0.262897
GO:0005198	structural molecule activity	molecular_function	3	1	46	94	14094	0.265319
GO:0008270	zinc ion binding	molecular_function	8	3	46	550	14094	0.266814
GO:0005085	guanyl-nucleotide exchange factor activity	molecular_function	7	1	46	95	14094	0.267733
GO:0046982	protein heterodimerization activity	molecular_function	6	2	46	312	14094	0.271033
GO:0043025	neuronal cell body	cellular_component	5	1	46	97	14094	0.272538
GO:0030027	lamellipodium	cellular_component	6	1	46	98	14094	0.274928
GO:0001650	fibrillar center	cellular_component	7	1	46	99	14094	0.277311
GO:0006412	translation	biological_process	8	2	46	319	14094	0.279546
GO:0008168	methyltransferase activity	molecular_function	6	1	46	105	14094	0.29145
GO:0042127	regulation of cell population proliferation	biological_process	6	1	46	106	14094	0.29378
GO:0005829	cytosol	cellular_component	6	8	46	1949	14094	0.299446
GO:0030424	axon	cellular_component	6	1	46	111	14094	0.305317
GO:0004888	transmembrane signaling receptor activity	molecular_function	5	1	46	113	14094	0.309881
GO:0032259	methylation	biological_process	4	1	46	113	14094	0.309881
GO:0005874	microtubule	cellular_component	7	1	46	116	14094	0.316671
GO:0005769	early endosome	cellular_component	8	1	46	118	14094	0.321161
GO:0003824	catalytic activity	molecular_function	3	2	46	357	14094	0.325593
GO:0060271	cilium assembly	biological_process	7	1	46	122	14094	0.330055
GO:0000166	nucleotide binding	molecular_function	5	4	46	894	14094	0.333617
GO:0005654	nucleoplasm	cellular_component	6	6	46	1459	14094	0.33972
GO:0005764	lysosome	cellular_component	8	1	46	128	14094	0.343183
GO:0010629	negative regulation of gene expression	biological_process	8	1	46	132	14094	0.351795
GO:0045944	positive regulation of transcription by RNA polymerase II	biological_process	10	3	46	648	14094	0.355124
GO:0010468	regulation of gene expression	biological_process	7	1	46	134	14094	0.356059
GO:0001701	in utero embryonic development	biological_process	8	1	46	137	14094	0.362404
GO:0005096	GTPase activator activity	molecular_function	6	1	46	139	14094	0.3666
GO:0016757	transferase activity, transferring glycosyl groups	molecular_function	5	1	46	139	14094	0.3666
GO:0030335	positive regulation of cell migration	biological_process	8	1	46	140	14094	0.368688
GO:0006508	proteolysis	biological_process	7	2	46	397	14094	0.373309
GO:0045202	synapse	cellular_component	3	1	46	148	14094	0.38515
GO:0006886	intracellular protein transport	biological_process	10	1	46	151	14094	0.391215
GO:0000287	magnesium ion binding	molecular_function	7	1	46	156	14094	0.401193
GO:0030054	cell junction	cellular_component	3	1	46	158	14094	0.405139
GO:0008017	microtubule binding	molecular_function	7	1	46	160	14094	0.409059
GO:0043065	positive regulation of apoptotic process	biological_process	9	1	46	165	14094	0.418751
GO:0005856	cytoskeleton	cellular_component	6	1	46	177	14094	0.441381
GO:0005102	signaling receptor binding	molecular_function	5	1	46	179	14094	0.445067
GO:0004672	protein kinase activity	molecular_function	7	2	46	460	14094	0.445666
GO:0005509	calcium ion binding	molecular_function	7	2	46	468	14094	0.454546
GO:0043547	positive regulation of GTPase activity	biological_process	8	1	46	186	14094	0.457785
GO:0098978	glutamatergic synapse	cellular_component	4	1	46	195	14094	0.473718
GO:0006974	cellular response to DNA damage stimulus	biological_process	6	1	46	196	14094	0.475459
GO:0006357	regulation of transcription by RNA polymerase II	biological_process	9	1	46	198	14094	0.478926
GO:0007155	cell adhesion	biological_process	4	1	46	200	14094	0.48237
GO:0008285	negative regulation of cell population proliferation	biological_process	7	1	46	208	14094	0.495926
GO:0006468	protein phosphorylation	biological_process	9	2	46	512	14094	0.50195
GO:0006355	regulation of transcription, DNA-templated	biological_process	8	3	46	818	14094	0.504145
GO:0055114	oxidation-reduction process	biological_process	4	2	46	517	14094	0.507176
GO:0003924	GTPase activity	molecular_function	9	1	46	221	14094	0.517217
GO:0001228	DNA-binding transcription activator activity, RNA polymerase II-specific	molecular_function	6	1	46	223	14094	0.520413
GO:0016567	protein ubiquitination	biological_process	11	1	46	236	14094	0.540691
GO:0005783	endoplasmic reticulum	cellular_component	6	2	46	561	14094	0.551662
GO:0010628	positive regulation of gene expression	biological_process	8	1	46	245	14094	0.554236
GO:0006811	ion transport	biological_process	6	1	46	270	14094	0.589842
GO:0000978	RNA polymerase II proximal promoter sequence-specific DNA binding	molecular_function	10	1	46	275	14094	0.596622
GO:0005525	GTP binding	molecular_function	8	1	46	296	14094	0.62392
GO:0045892	negative regulation of transcription, DNA-templated	biological_process	9	1	46	297	14094	0.625174
GO:0043565	sequence-specific DNA binding	molecular_function	7	1	46	310	14094	0.641105
GO:0005634	nucleus	cellular_component	6	9	46	2979	14094	0.660181
GO:0032991	protein-containing complex	cellular_component	3	1	46	342	14094	0.677553
GO:0005813	centrosome	cellular_component	7	1	46	349	14094	0.685029
GO:0055085	transmembrane transport	biological_process	6	1	46	424	14094	0.755215
GO:0005615	extracellular space	cellular_component	4	1	46	424	14094	0.755215
GO:0000122	negative regulation of transcription by RNA polymerase II	biological_process	10	1	46	438	14094	0.766504
GO:0003700	DNA-binding transcription factor activity	molecular_function	4	1	46	452	14094	0.777282
GO:0003723	RNA binding	molecular_function	6	1	46	499	14094	0.810026
GO:0016740	transferase activity	molecular_function	4	1	46	684	14094	0.898954
GO:0042802	identical protein binding	molecular_function	5	1	46	704	14094	0.90567
GO:0016021	integral component of membrane	cellular_component	5	7	46	3621	14094	0.969961
GO:0016020	membrane	cellular_component	3	6	46	4061	14094	0.996718

## Sheet: Table 7B
pathway_id	pathway_name	S.gene.number	TS.gene.number	B.gene.number	TB.gene.number	pvalue
ko04530	Tight junction	3	20	131	5193	0.0130654
ko00534	Glycosaminoglycan biosynthesis - heparan sulfate / heparin	1	20	15	5193	0.0563122
ko04142	Lysosome	2	20	102	5193	0.0577008
ko05224	Breast cancer	2	20	103	5193	0.0587095
ko04614	Renin-angiotensin system	1	20	19	5193	0.0708121
ko04150	mTOR signaling pathway	2	20	117	5193	0.0734661
ko03013	RNA transport	2	20	132	5193	0.0904716
ko00051	Fructose and mannose metabolism	1	20	29	5193	0.106142
ko03410	Base excision repair	1	20	29	5193	0.106142
ko05205	Proteoglycans in cancer	2	20	158	5193	0.12238
ko00270	Cysteine and methionine metabolism	1	20	39	5193	0.140192
ko04612	Antigen processing and presentation	1	20	45	5193	0.160028
ko05217	Basal cell carcinoma	1	20	46	5193	0.163291
ko00010	Glycolysis / Gluconeogenesis	1	20	52	5193	0.182619
ko04137	Mitophagy - animal	1	20	53	5193	0.185799
ko05100	Bacterial invasion of epithelial cells	1	20	61	5193	0.210818
ko00562	Inositol phosphate metabolism	1	20	63	5193	0.216958
ko04540	Gap junction	1	20	63	5193	0.216958
ko04211	Longevity regulating pathway	1	20	73	5193	0.246982
ko04916	Melanogenesis	1	20	74	5193	0.249923
ko04915	Estrogen signaling pathway	1	20	92	5193	0.301039
ko04670	Leukocyte transendothelial migration	1	20	94	5193	0.30651
ko04550	Signaling pathways regulating pluripotency of stem cells	1	20	95	5193	0.30923
ko04919	Thyroid hormone signaling pathway	1	20	96	5193	0.31194
ko05226	Gastric cancer	1	20	103	5193	0.330629
ko04152	AMPK signaling pathway	1	20	105	5193	0.33588
ko04514	Cell adhesion molecules (CAMs)	1	20	105	5193	0.33588
ko04210	Apoptosis	1	20	105	5193	0.33588
ko04630	Jak-STAT signaling pathway	1	20	107	5193	0.341091
ko04145	Phagosome	1	20	108	5193	0.343682
ko04310	Wnt signaling pathway	1	20	108	5193	0.343682
ko04140	Autophagy - animal	1	20	111	5193	0.351397
ko04390	Hippo signaling pathway	1	20	113	5193	0.356493
ko04934	Cushing syndrome	1	20	113	5193	0.356493
ko05418	Fluid shear stress and atherosclerosis	1	20	118	5193	0.369066
ko04022	cGMP-PKG signaling pathway	1	20	125	5193	0.386276
ko05225	Hepatocellular carcinoma	1	20	133	5193	0.4054
ko05206	MicroRNAs in cancer	1	20	139	5193	0.419369
ko04360	Axon guidance	1	20	145	5193	0.433026
ko05200	Pathways in cancer	2	20	388	5193	0.446971
ko04015	Rap1 signaling pathway	1	20	155	5193	0.455113
ko05203	Viral carcinogenesis	1	20	155	5193	0.455113
ko04714	Thermogenesis	1	20	166	5193	0.478463
ko05166	Human T-cell leukemia virus 1 infection	1	20	170	5193	0.486716
ko04010	MAPK signaling pathway	1	20	221	5193	0.581642
ko05168	Herpes simplex virus 1 infection	1	20	231	5193	0.598184
ko05165	Human papillomavirus infection	1	20	251	5193	0.629422
