# Supplementary material for: Identification and co-expression analysis of long noncoding RNAs and mRNAs involved in the deposition of intramuscular fat in Aohan fine-wool sheep
Source: BMC Genomics. 2021 Feb 1;22:98. doi: 10.1186/s12864-021-07385-9 (PMC7852088; doi:10.1186/s12864-021-07385-9)
Supplement: Supplementary file 8 — Additional file 8 Table S8. Primers used in the qRT-PCR analysis. [file 12864_2021_7385_MOESM8_ESM.xlsx]

## Sheet: Table S8
Genes	Sequence(5'to3'）
MSTRG.21238.1-F	TCCAACTCTCACATCCATAC
MSTRG.21238.1-R	AATTAAAAGACACTTGCTCC
MSTRG.11343.4-F	GGATGTGTCTGGAGTCTTGGA
MSTRG.11343.4-R	CCCCGATAGAGGAGACGAGTA
MSTRG.2792.1-F	ACCCACGCTTTTGTTC
MSTRG.2792.1-R	CTTCAGCCTCTTGCCC
MSTRG.12864.1-F	TTTGAGAGGTCGTGTATT
MSTRG.12864.1-R	CCAGAGGAGTTAGTTTTG
MSTRG.4051.3-F	AGTTACCCCTGCCCTTCG
MSTRG.4051.3-R	CCTCCTGTCTGGTCTTCG
Reference gene：β-actin-F	GGACTTCGAGCAGGAGATGG
Reference gene：β-actin-R	AGGAAGGAGGGCTGGAAGAG
HSPA6-F	CTCTTGCTGCTGGATGTG
HSPA6-R	TGCTTGGTTGGGATAGTG
IGF-2-F	CTTCGCCTCGTGCTGCTA
IGF-2-R	CGGCTGCGTCGGTTTAT
SCD-F	AGATTTATCCGACCTAAGAGC
SCD-R	CCATAGATACCACGGCAC
CAPN6-F	GCCTCCACCACCTCTACATT
CAPN6-R	TAGCCACGAGCCAGATTCC
DLK1-F	GCGTCCTGAAGGTGTCCAT
DLK1-R	GCAGCAGCAGATTCTTCTTCT
